# Supplementary material
Source: PubMed Central journal article supplement (PMC3386067)
Supplement: 1121203109_pnas.1121203109_SI.pdf [file 1121203109_pnas.1121203109_SI.pdf]

# Supporting Information

Meyer et al. 10.1073/pnas.1121203109

## SI Methods

Founder female C7.3 was mated with C57BL/6 males and genomic DNA was isolated from the tail tips of offspring, following the Wizard Genomic DNA Purification Kit (Promega) protocol. The DNA pellet was dissolved in 100  $\mu$ L 10 mM Tris-Cl, pH 8.5, incubated overnight at room temperature, and stored for further analysis at 4°C. To analyze the *Rab38* alleles in a first round, we amplified the DNA from mice using the PCR primer pair P for (5'-GGCCTCCAGGATGCAGACACC-3') and P-rev (5'-CCAGCAATGTCCCAGAGCTGC-3'). Amplification was performed using Taq polymerase (Qiagen) in 25  $\mu$ L reactions with 35 cycles of 94°C–40 s, 58°C–40 s, and 72°C–1 min. Afterwards, the PCR products were directly digested with 10 units of BsaJI or ApaLI in a volume of 30  $\mu$ L and loaded on an 1.5% agarose gel.

The fragments undigested with ApaLI, which include products from the recombined allele, were extracted with the Qiaquick Gel Extraction Kit (Qiagen, Hilden, Germany) and sequenced (GATC, Konstanz, Germany). The sequence results were compared to the expected sequences using the Vector NTI software (Invitrogen). For Southern blot analysis, genomic DNA from positive recombined mice was digested overnight with the appropriate restriction enzyme. Southern blot analysis was performed as previously described (8) using the *Rab38* 5' probe, which was obtained by PCR amplification (P\_Rab1: 5'-ctggaactaaaatt-caaggtgttatac-3', P\_Rab2: 5'-TATTTCATTCACTTAACCATTT-GTTC-3') from C57BL/6N genomic DNA and purified with the Qiaquick PCR Purification Kit (Qiagen).

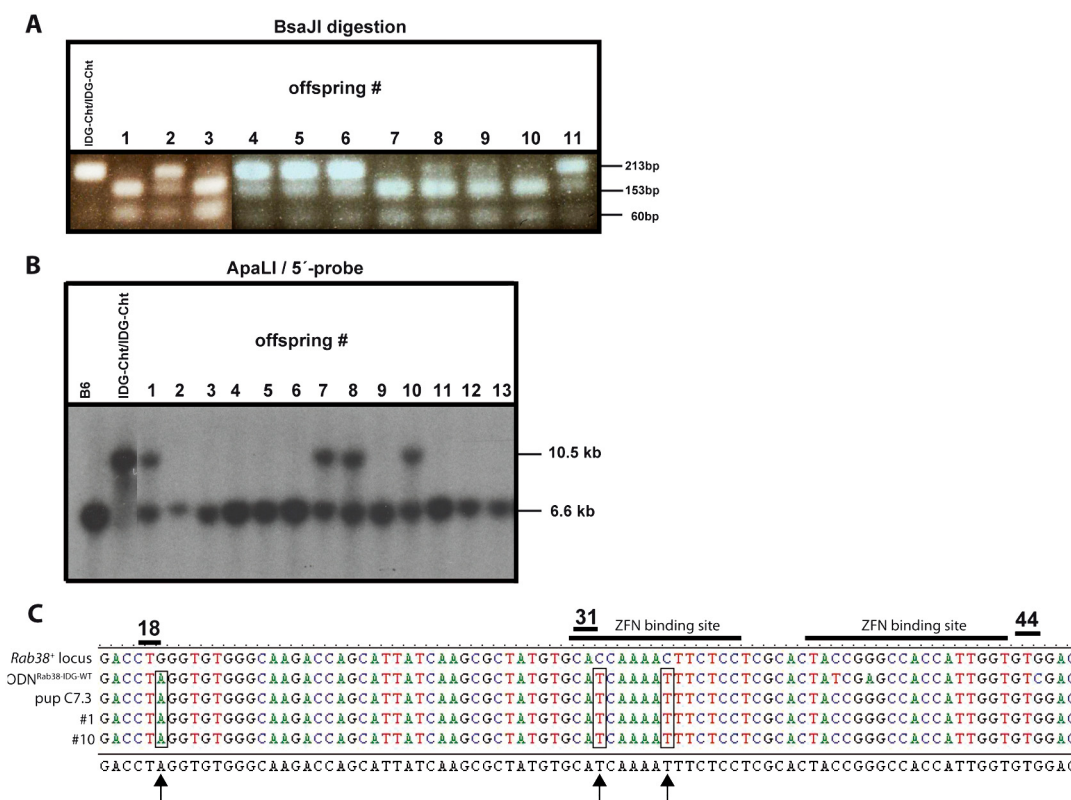

**Fig. S1.** Germline transmission of the *Rab38*<sup>IDG-WT</sup> allele. (A) PCR amplification with primer pair P-for/P-rev of a 213 bp region covering the first exon of *Rab38* from DNA derived from 11 offspring (#1–#11) of founder female C7.3 (*Rab38*<sup>IDG-WT</sup>/*Rab38*<sup>cht</sup> genotype) and a C57BL/6 wild type male. The *Rab38* genotype was initially determined by digestion of the PCR products with BsaJI. PCR products derived from a maternal *Rab38*<sup>IDG-WT</sup> or *Rab38*<sup>+</sup> allele or a paternal *Rab38*<sup>+</sup> allele are digested into fragments of 153 bp and 60 bp; product from a *Rab38*<sup>cht</sup> (homozygous *Rab38*<sup>IDG-WT</sup> control mouse; IDG-Cht/IDG-Cht) is resistant to BsaJI digestion. Therefore, PCR products that are only partially digested by BsaJI (#2, 4, 5, 6, 11) indicate the presence of a maternal *Rab38*<sup>cht</sup> and a paternal *Rab38*<sup>+</sup> allele. Offspring that harbor a maternal *Rab38*<sup>IDG-WT</sup> or *Rab38*<sup>+</sup> and a paternal *Rab38*<sup>+</sup> allele are fully digested by BsaJI (#1, 3, 7, 8, 9, 10). (B) Southern blot analysis of ApaLI digested genomic DNA from the 13 offspring of founder C7.3 showed the presence of a maternal *Rab38*<sup>IDG-WT</sup> allele in pups #1, 7, 8, and 10, indicated by a 10.5 kb band, as compared to a 6.6 kb band derived from the paternal *Rab38*<sup>+</sup> locus. Controls: ApaLI digested DNA from a C57BL/6 wild type (B6) and a homozygous *Rab38*<sup>IDG-WT</sup> (IDG-Cht/IDG-Cht) mouse. Since pups #3 and #9 inherited a maternal *Rab38*<sup>+</sup> allele, the founder C7.3 is heterozygous for a *Rab38*<sup>cht</sup> allele but exhibits a mosaic genotype for the *Rab38*<sup>+</sup> and *Rab38*<sup>IDG-WT</sup> alleles at an approximate ratio of 1 : 2. (C) For the sequence analysis of PCR products derived from the maternal *Rab38*<sup>IDG-WT</sup> allele PCR products were digested with ApaLI and resistant products isolated and directly sequenced (products derived from a paternal *Rab38*<sup>+</sup> or a maternal *Rab38*<sup>cht</sup> allele are sensitive to ApaLI digestion). The comparison of sequences derived from offspring #1 and #10 showed the identity of their *Rab38*<sup>IDG-WT</sup> alleles to the maternal allele of founder C7.3, represented by three nucleotide replacements (arrows) in codon 18 and the upstream ZFN binding site, as compared to the *Rab38*<sup>+</sup> locus.
